# Supplementary material for: Genotype-Phenotype Correlations in 208 Individuals with Coffin-Siris Syndrome
Source: MDPI journal article supplement (doi:10.3390/genes12060937), 2021-06-19
Supplement: s1 [file s1]

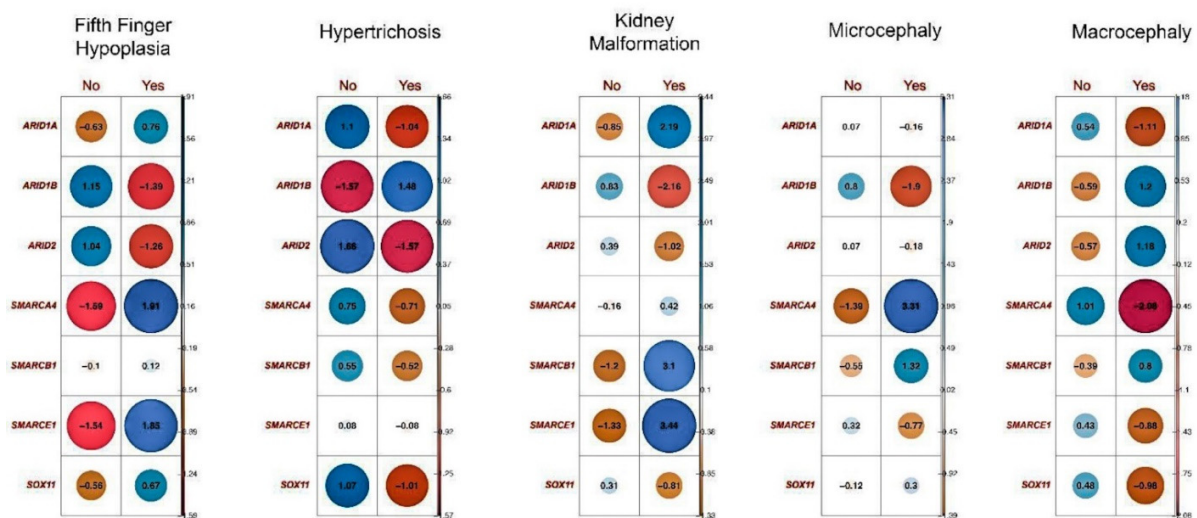

**Supplemental Figure S1.** Adjusted Pearson residuals for five binary phenotypes in individuals with variants in the BAF complex.

Supplemental Figure S1 visualizes the adjusted Pearson residuals for the five binary phenotypes with  $p < 0.05$  from Chi-square analyses. The size and color scale of each circle indicate the magnitude of the residual, with a blue color scale used for residual values  $> 0$  and a red color scale used for residuals  $< 0$ . For each phenotype, the genotype group is displayed along the vertical axis, while the binary response (yes = phenotype present, no = phenotype absent) is displayed along the horizontal
